# Supplementary material for: Electrochemical Sensing of Gallic Acid in Beverages Using a 3D Bio-Nanocomposite Based on Carbon Nanotubes/Spongin-Atacamite
Source: MDPI journal article supplement (doi:10.3390/bios13020262), 2023-02-13
Supplement: s1 [file s1]

# Electrochemical Sensing of Gallic Acid in Beverages Using a 3D Bio-Nanocomposite Based on Carbon Nanotubes/Spongins-Atacamite

Sedigheh Falahi <sup>1</sup>, Sepideh Falahi <sup>2</sup>, Mashaallah Zarejousheghani <sup>3</sup>, Hermann Ehrlich <sup>1</sup>, Yvonne Joseph <sup>1,3</sup> and Parvaneh Rahimi <sup>1,3,\*</sup>

<sup>1</sup> Institute of Electronic and Sensor Materials, Faculty of Materials Science and Materials Technology, Technische Universität Bergakademie Freiberg, 09599 Freiberg, Germany

<sup>2</sup> Faculty of Medicine, Kermanshah University of Medical Sciences, 6715847141 Kermanshah, Iran

<sup>3</sup> Freiberg Center for Water Research-ZeWaF, Technische Universität Bergakademie Freiberg, 09599 Freiberg, Germany

\* Correspondence: parvaneh.rahimi@esm.tu-freiberg.de; Tel.: +49-3731-39-2644

## 3.8. Stability, Reproducibility, and Repeatability of Sp-At/MWCNTs/CPE

Important factors like selectivity, reproducibility, and repeatability were studied to estimate the proposed method's applicability. To test the reproducibility, the DPV response of four Sp-At/MWCNTs/CPE fresh electrodes to 0.1 M phosphate buffer pH 4 containing 30  $\mu$ M GA was investigated (Figure S1). The relative standard deviation (RSD) of anodic peak currents was 4.22%, indicating that the prepared electrodes are highly reproducible. For the repeatability test, eight successive measurements of 30  $\mu$ M GA on one Sp-At/MWCNTs/CPE yielded an RSD of 0.62%, confirming the good repeatable behavior of the fabricated sensor (Figure S2). The long-term stability test was evaluated by the DPV measurements of the Sp-At/MWCNTs/CPE in the presence of 30  $\mu$ M GA. The current remained over 87% of its initial value after a month, suggesting that the proposed sensor is remarkably stable (Figure S3).

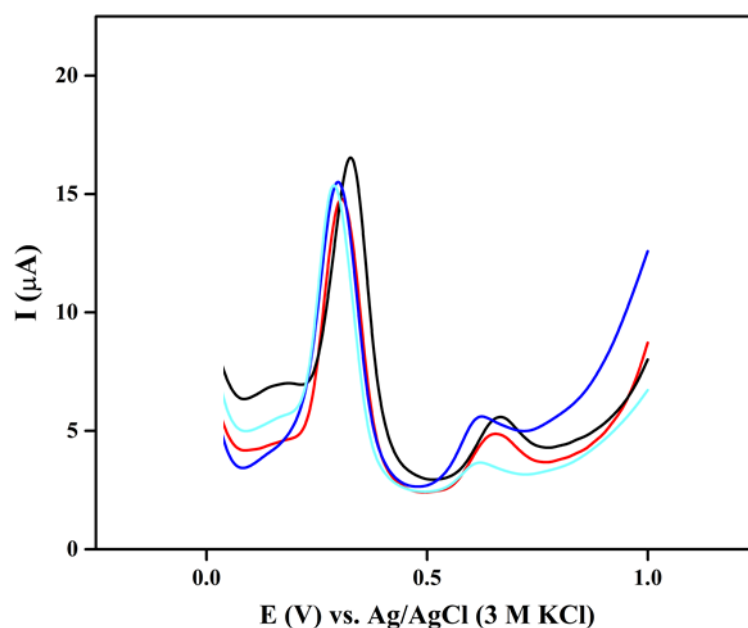

**Figure S1.** DPVs of Sp-At/MWCNTs/CPE in 0.1 M phosphate buffer pH 4 containing 30  $\mu$ M GA at a scan rate of 0.1 V.s<sup>-1</sup> (4 fresh electrodes).

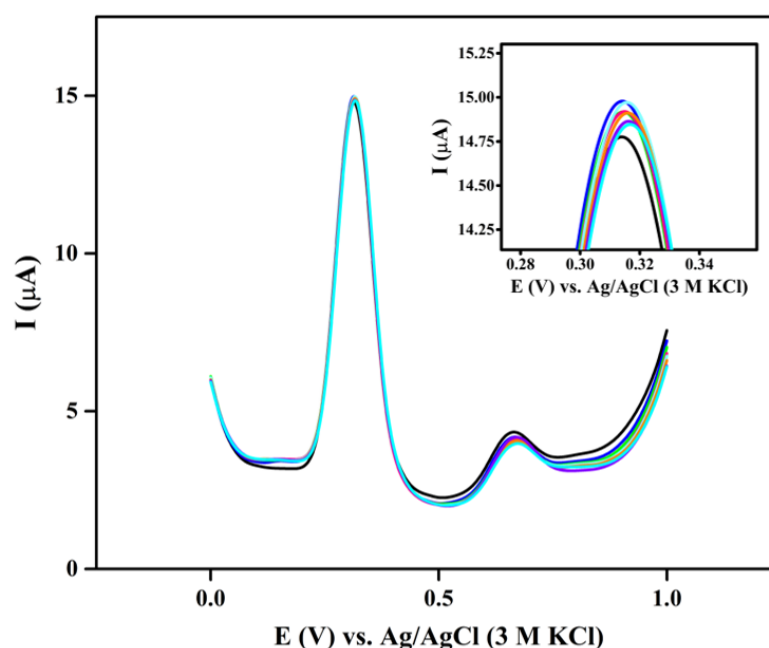

**Figure S2.** DPVs of Sp-At/MWCNTs/CPE in 0.1 M phosphate buffer pH 4 containing 30  $\mu\text{M}$  GA at a scan rate of 0.1  $\text{V.s}^{-1}$  (8 replicates).

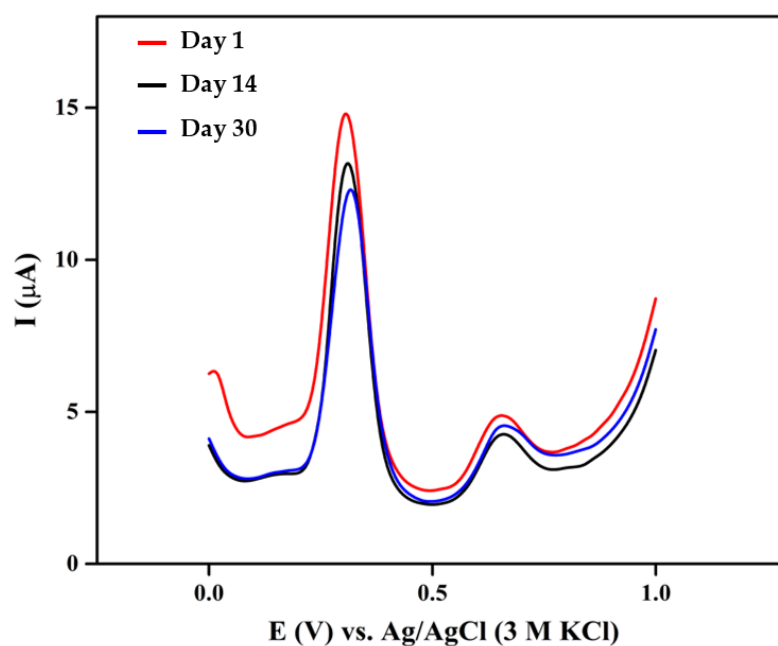

**Figure S3.** DPVs of Sp-At/MWCNTs/CPE in 0.1 M phosphate buffer pH 4 containing 30  $\mu\text{M}$  GA at a scan rate of 0.1  $\text{V.s}^{-1}$  (recorded within 30 days).

### 3.9. Determination of GA in Real Samples

Determination of GA content in black and green tea and red wine accomplished utilizing Sp-At/MWCNTs/CPE sensor. The samples were prepared in 0.1 M phosphate buffer pH 4 and then spiked with standard GA solutions to obtain a GA range from 0 to 30  $\mu\text{M}$ , followed by recording their corresponding DPV voltammograms Figure S4a-c. In all real samples (red wine, black tea, and green tea), GA was detected and quantified based on the generated  $I_{\text{pa}}$ , which is generally attributed to the total antioxidant capacity of the sample, as described [55]. More oxidation peaks were produced with increasing spiked GA

concentrations in all samples. Then according to the standard addition plot as depicted in Figure S4d linear regression equations of  $I_{pa} (\mu A) = 214.3 C_{GA} (mM) + 7.2429$  ( $R^2 = 0.9995$ ),  $I_{pa} (\mu A) = 228.7 C_{GA} (mM) + 7.1271$  ( $R^2 = 0.9999$ ), and  $I_{pa} (\mu A) = 232.9 C_{GA} (mM) + 4.0286$  ( $R^2 = 0.9928$ ) were obtained for black tea, green tea and red wine sample standard addition curves respectively.

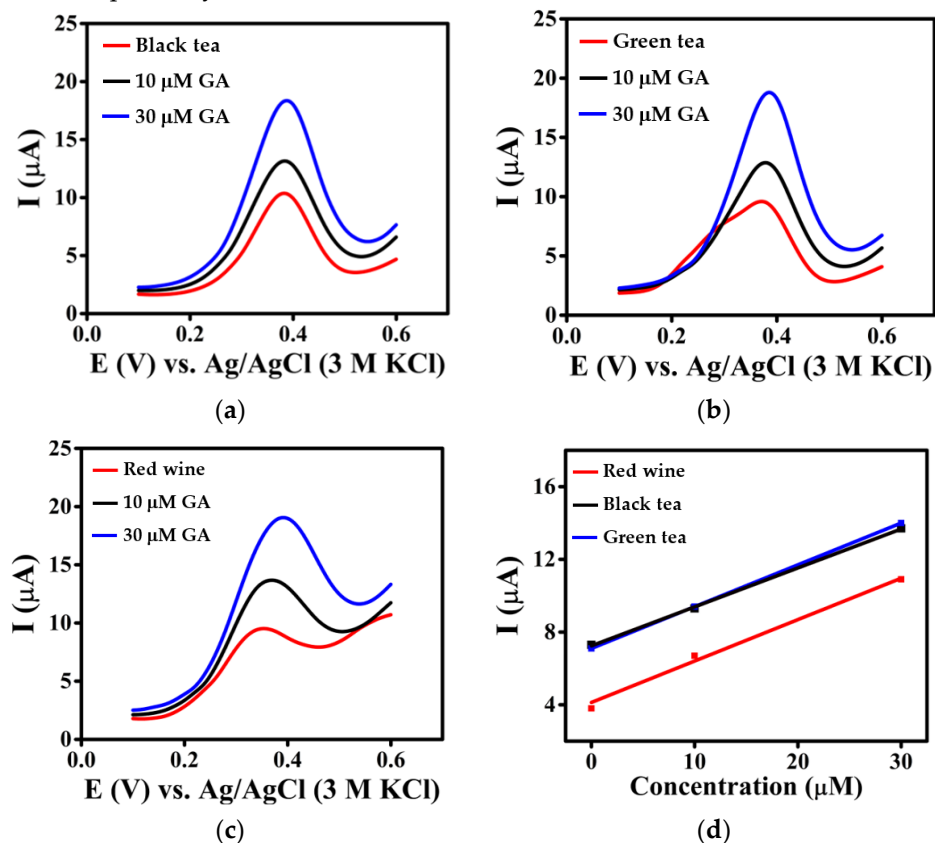

**Figure S4.** DPVs of Sp-At/MWCNTs/CPE in 0.1 M phosphate buffer pH 4 containing (a) black tea sample, (b) green tea sample, and (c) red wine sample and increasing amounts of GA standard solutions. (d) Corresponding standard addition curves for determination of GA in samples.
